# Supplementary material
Source: PubMed Central journal article supplement (PMC7831346)
Supplement: jaalas20210004.SD1.pdf [file jaalas20210004.SD1.pdf]

**Table S1:** Results of QC of hematology analysis using the Procyte Dx and the XT 2000iV analyzers

| Variable<br>(Unit)                    | ProCyte Dx        |                   |           |            | XT 2000iV         |                   |           |            | TEa %    |
|---------------------------------------|-------------------|-------------------|-----------|------------|-------------------|-------------------|-----------|------------|----------|
|                                       | Expected<br>value | Precision<br>CV % | Bias<br>% | TEobs<br>% | Expected<br>value | Precision<br>CV % | Bias<br>% | TEobs<br>% |          |
| RBCI<br>(10 <sup>12</sup> /L)         | 2.25              | 0.7               | -2.5      | 3.9        | 2.36              | 0.6               | 0.0       | 1.2        | 3.1/6.2  |
|                                       | 4.40              | 0.6               | -3.0      | 4.2        | 4.40              | 0.5               | -0.5      | 1.5        |          |
|                                       |                   |                   |           |            | 5.31              | 0.5               | -0.4      | 1.4        |          |
| RBCO<br>(10 <sup>12</sup> /L)         | 2.29              | 2.0               | 0.5       | 4.5        | 2.40              | 1.3               | -2.9      | 5.5        | 3.1/6.2  |
|                                       | 4.31              | 0.8               | 0.3       | 1.9        | 4.30              | 0.8               | -3.3      | 4.9        |          |
|                                       |                   |                   |           |            | 5.21              | 1.0               | -3.1      | 5.1        |          |
| HGB<br>(g/L)                          | 56                | 0.9               | -1.9      | 3.7        | 58                | 0.9               | 0.0       | 1.8        | 3.4/6.8  |
|                                       | 126               | 1.0               | -4.0      | 6.0        | 121               | 0.8               | 0.0       | 1.6        |          |
|                                       |                   |                   |           |            | 161               | 0.6               | 0.6       | 1.8        |          |
| Hct<br>(L/L)                          | 0.165             | 1.3               | -3.4      | 6.0        | 0.180             | 0.7               | -0.6      | 2.0        | 3.7/7.3  |
|                                       | 0.370             | 0.0               | -5.1      | 5.1        | 0.359             | 0.4               | 0.0       | 0.8        |          |
|                                       |                   |                   |           |            | 0.471             | 0.5               | 0.2       | 1.2        |          |
| MCV<br>(fL)                           | 73.5              | 1.1               | -1.1      | 3.3        | 76.3              | 0.5               | -0.3      | 1.3        |          |
|                                       | 84.1              | 1.0               | -2.2      | 4.2        | 81.6              | 0.2               | 0.6       | 1.1        |          |
|                                       |                   |                   |           |            | 88.7              | 0.2               | 0.6       | 1.0        |          |
| MCH<br>(pg)                           | 24.9              | 0.8               | 0.6       | 2.2        | 24.6              | 1.0               | 0.4       | 2.4        |          |
|                                       | 28.6              | 0.9               | -1.0      | 2.8        | 27.5              | 0.8               | 0.4       | 2.0        |          |
|                                       |                   |                   |           |            | 30.3              | 0.7               | 1.0       | 2.4        |          |
| MCHC<br>(g/L)                         | 339               | 1.3               | 1.7       | 4.3        | 322               | 1.1               | 0.6       | 2.8        |          |
|                                       | 341               | 1.5               | 10.1      | 4.1        | 337               | 0.9               | -0.3      | 2.1        |          |
|                                       |                   |                   |           |            | 342               | 0.7               | 0.0       | 1.4        |          |
| RDWSD<br>(fL)                         | 46.9              | 1.0               | -4.4      | 6.4        | 44.5              | 0.4               | -4.0      | 4.8        |          |
|                                       | 42.6              | 1.0               | 5.2       | 7.2        | 45.9              | 0.5               | -1.5      | 2.5        |          |
|                                       |                   |                   |           |            | 45                | 1.0               | -0.7      | 2.7        |          |
| RDWCV<br>(%)                          | 18.5              | 0.8               | -3.5      | 5.1        | 16.3              | 0.9               | -3.1      | 4.9        |          |
|                                       | 15.1              | 0.8               | 7.6       | 9.2        | 15.8              | 0.7               | -1.9      | 3.3        |          |
|                                       |                   |                   |           |            | 14.5              | 0.6               | -0.0      | 1.2        |          |
| Reticulocytes<br>(10 <sup>9</sup> /L) | 120.5             | 2.8               | 8.8       | 14.4       | 180               | 4.6               | -11.1     | 20.3       |          |
|                                       | 94.5              | 4.4               | -4.2      | 13.0       | 105               | 3.9               | -4.8      | 12.6       |          |
|                                       |                   |                   |           |            | 60.0              | 4.7               | -16.7     | 26.1       |          |
| Reticulocytes<br>(%)                  | 5.36              | 2.8               | 11.6      | 17.2       | 7.65              | 4.6               | -9.3      | 18.5       |          |
|                                       | 2.2               | 4.5               | -1.4      | 10.4       | 2.39              | 4.1               | -4.2      | 12.4       |          |
|                                       |                   |                   |           |            | 1.12              | 4.7               | -17.9     | 27.3       |          |
| PLT-I<br>(10 <sup>9</sup> /L)         | 61                | 4.8               | -9.6      | 19.2       | 55                | 5.1               | -3.6      | 13.8       |          |
|                                       | 241               | 1.9               | -4.7      | 8.5        | 212               | 2.3               | -2.8      | 7.4        |          |
|                                       |                   |                   |           |            | 496               | 1.6               | -4.4      | 7.6        |          |
| PLT-O<br>(10 <sup>9</sup> /l)         | 51                | 5.2               | -6.0      | 16.4       | 49                | 5.3               | 10.2      | 20.8       |          |
|                                       | 205               | 2.5               | -6.9      | 11.9       | 202               | 3.2               | -0.5      | 6.9        |          |
|                                       |                   |                   |           |            | 507               | 2.5               | -6.7      | 11.7       |          |
| PDW<br>(fL)                           | 8.9               | 6.7               | 5.1       | 18.5       | 7.6               | 4.7               | 2.6       | 12.0       |          |
|                                       | 9.4               | 2.9               | 0.9       | 6.7        | 8.5               | 3.1               | 2.4       | 8.6        |          |
|                                       |                   |                   |           |            | 8.6               | 1.7               | 0.0       | 3.4        |          |
| PCT<br>(L/L)                          | 0.5               | 10.9              | -7.2      | 29.0       | 0.0005            | 9.1               | 0.0       | 18.2       |          |
|                                       | 2.2               | 2.7               | -6.1      | 11.5       | 0.002             | 3.2               | -5.0      | 11.4       |          |
|                                       |                   |                   |           |            | 0.0045            | 1.7               | 11.1      | 14.5       |          |
| MPV<br>(fL)                           | 8.1               | 2.0               | 2.6       | 6.6        | 8.6               | 2.7               | 4.7       | 10.1       |          |
|                                       | 9.0               | 1.2               | -0.3      | 2.7        | 9.2               | 1.3               | 3.3       | 5.9        |          |
|                                       |                   |                   |           |            | 9.2               | 0.6               | 2.2       | 3.4        |          |
| PLCR<br>(%)                           | 8.4               | 7.6               | 26.9      | 42.1       | 10.8              | 10.0              | 17.6      | 37.6       |          |
|                                       | 11.9              | 4.9               | 6.4       | 16.2       | 13.5              | 4.9               | 11.1      | 20.9       |          |
|                                       |                   |                   |           |            | 13.1              | 3.2               | 8.4       | 14.8       |          |
| WBC<br>(10 <sup>9</sup> /L)           | 3.17              | 1.9               | -2.8      | 6.6        | 2.95              | 2.5               | 2.4       | 7.4        | 7.2/14.3 |
|                                       | 7.41              | 1.3               | -1.3      | 3.9        | 6.86              | 1.6               | 0.4       | 3.6        |          |
|                                       |                   |                   |           |            | 16.79             | 1.2               | 2.3       | 4.7        |          |
| Neutrophils<br>(10 <sup>9</sup> /L)   | 1.38              | 3.1               | -15.7     | 21.9       | 1.26              | 3.7               | 7.1       | 14.5       |          |
|                                       | 3.43              | 2.2               | -13.9     | 18.3       | 3.27              | 2.4               | 1.2       | 6.0        |          |
|                                       |                   |                   |           |            | 9.06              | 1.7               | 2.4       | 5.8        |          |
| Lymphocytes<br>(10 <sup>9</sup> /L)   | 1.38              | 4.5               | -19.3     | 28.3       | 1.02              | 4.0               | 2.9       | 10.9       |          |
|                                       | 2.36              | 2.9               | 1.5       | 7.3        | 2.09              | 6.2               | 0.5       | 12.9       |          |
|                                       |                   |                   |           |            | 4.14              | 1.4               | 4.1       | 6.9        |          |
| Monocytes<br>(10 <sup>9</sup> /L)     | 0.48              | 8.9               | -24.0     | 41.8       | 0.39              | 8.7               | -12.8     | 30.2       |          |
|                                       | 0.90              | 5.6               | -4.0      | 15.2       | 0.81              | 7.2               | -7.4      | 21.8       |          |
|                                       |                   |                   |           |            | 1.75              | 4.5               | -4.0      | 13.0       |          |
| Eosinophils                           | 0.27              | 4.8               | -39.1     | 48.7       | 0.28              | 7.1               | 3.6       | 17.8       |          |

|                      |      |     |      |      |      |      |      |      |
|----------------------|------|-----|------|------|------|------|------|------|
| (10 <sup>9</sup> /L) | 0.72 | 8.2 | -4.0 | 20.4 | 0.69 | 7.3  | 5.8  | 20.4 |
|                      |      |     |      |      | 1.84 | 8.6  | 3.3  | 20.5 |
| LFR                  |      |     |      |      | 73.8 | 3.7  | -0.3 | 7.7  |
| (%)                  |      |     |      |      | 74.4 | 3.9  | -3.8 | 11.6 |
|                      |      |     |      |      | 83.5 | 3.9  | -4.3 | 12.1 |
| MFR                  |      |     |      |      | 21.4 | 9.9  | 1.8  | 21.6 |
| (%)                  |      |     |      |      | 20.9 | 10.3 | 12.2 | 32.8 |
|                      |      |     |      |      | 14.3 | 12.2 | 16.6 | 41.0 |
| HFR                  |      |     |      |      | 4.9  | 21.7 | -5.5 | 48.9 |
| (%)                  |      |     |      |      | 4.9  | 15.1 | 2.4  | 32.6 |
|                      |      |     |      |      | 3.6  | 41.3 | -3.9 | 86.5 |
| IRF                  |      |     |      |      | 26.2 | 10.2 | 0.8  | 21.2 |
| (%)                  |      |     |      |      | 25.6 | 9.8  | 11.2 | 30.8 |
|                      |      |     |      |      | 17.3 | 15.5 | 16.3 | 47.3 |

TEobs: total error observed; TEa: total allowable error according to Harr and colleagues,<sup>20</sup>

**Table S2:** Results of QC of biochemical analysis using the Vetscan VS2 analyzer

| Variable   | Expected value |        | Precision CV |        | TEobs | TEa    |
|------------|----------------|--------|--------------|--------|-------|--------|
|            |                |        | %            | Bias % |       |        |
| Sodium     | 164            | mmol/L | 1.3          | 2.1    | 4.7   | 5      |
| Potassium  | 6.2            | mmol/L | 2.0          | 12.3   | 16.3  | 5      |
| Calcium    | 2.74           | mmol/L | 1.4          | 5.0    | 7.8   | 10     |
| Phosphate  | 2.13           | mmol/L | 2.3          | 9.5    | 14.0  | 5      |
| Glucose    | 14.2           | mmol/L | 1.3          | -3.2   | 5.8   | 20     |
| Urea       | 15.7           | mmol/L | 2.2          | 2.3    | 6.6   | 12     |
| Creatinine | 310            | μmol/L | 3.9          | -1.0   | 8.8   | 20     |
| Bilirubin  | 82.1           | μmol/L | 1.8          | -0.8   | 4.5   | 30     |
| Proteins   | 66             | g/L    | 2.6          | 1.4    | 6.7   | 10     |
| Albumin    | 50             | g/L    | -1.4         | 9.6    | 12.4  | 15     |
| Globulins  | 16             | g/L    | 9.1          | -2.2   | 20.5  | nd     |
| ALP        | 227            | U/L    | 5.0          | 3.6    | 13.6  | 25/20* |
| ALT        | 88             | U/L    | 3.2          | -4.0   | 10.5  | 25     |
| Amylase    | 222            | U/L    | 1.4          | -3.0   | 5.7   | 25     |

TEobs: total error observed; TEa: total allowable error according to Harr and colleagues,<sup>20</sup>

\* desirable

**Table S3.** Reference intervals for RBC, reticulocyte, total WBC and PLT counts in NSG male and female mice measured with IDEXX ProCyt Dx and Sysmex XT-2000iV analyzers.

| Variable (unit)             | Analyzer | LLRI (90%CI)        | ULRI (90%CI)        |
|-----------------------------|----------|---------------------|---------------------|
| RBC-I (10 <sup>12</sup> /L) | P/S      | 7.03 (7.02–7.82)    | 9.08 (8.88–9.09)    |
| RBC-O (10 <sup>12</sup> /L) | P        | 7.12 (7.10–7.93)    | 9.20 (9.05–9.41)    |
|                             | S        | 6.79 (6.77–7.52)    | 8.66 (8.36–8.67)    |
| HGB (g/L)                   | P/S      | 121.1 (121.0–129.0) | 149.7 (144.4–149.5) |
| Hct (L/L)                   | P        | 0.393 (0.393–0.419) | 0.497 (0.478–0.497) |
|                             | S        | 0.378 (0.378–0.393) | 0.459 (0.450–0.459) |
| MCV (fL)                    | P        | 51.6 (51.6–52.5)    | 56.5 (55.8–56.5)    |
|                             | S        | 49.2 (49.2–49.6)    | 54.1 (52.5–54.1)    |
| MCH (pg)                    | P        | 15.9 (15.9–16.1)    | 17.2 (16.8–17.2)    |
|                             | S        | 16.0 (16.0–16.1)    | 17.3 (16.9–17.3)    |
| MCHC (g/L)                  | P        | 290 (290–299)       | 315 (312–315)       |
|                             | S        | 306 (306–313)       | 334 (333–334)       |
| RDW-SD (fL)                 | P        | 28.4 (28.4–29.2)    | 34.6 (32.2–34.6)    |
|                             | S        | 27.8 (27.8–28.5)    | 33.7 (31.0–33.8)    |
| RDW-CV (%)                  | P        | 20.6 (20.6–20.8)    | 22.4 (22.4–22.4)    |
|                             | S        | 18.2 (18.2–18.5)    | 20.0 (19.5–20.0)    |
| RBC-HGB (pg)                | P        | 17.7 (17.7–17.8)    | 18.9 (18.6–18.9)    |
|                             | S        | 16.7 (16.7–16.9)    | 18.0 (17.6–18.0)    |
| RET (10 <sup>9</sup> /L)    | P/S      | 339 (313–373)       | 649 (597–706)       |
| RET (%)                     | P/S      | 4.30 (4.03–4.65)    | 7.89 (7.16–8.74)    |
| IRF(%)                      | P        | 54.0 (54.0–56.1)    | 70.1 (66.5–70.1)S   |
|                             | S        | 37.9 (37.9–41.4)    | 55.7 (49.7–55.8)    |
| LRF(%)                      | P        | 30.0 (29.9–33.8)    | 46.0 (44.6–46.0)    |
|                             | S        | 17.3 (17.3–18.2)    | 22.9 (22.4–22.9)    |
| MRF(%)                      | P        | 12.3 (12.3–14.6)    | 20.0 (19.5–20.0)    |
|                             | S        | 24.8 (24.8–29.6)    | 43.6 (41.6–43.6)    |
| HRF(%)                      | P        | 34.1 (34.0–38.8)    | 55.4 (52.7–55.5)    |
|                             | S        | 44.3 (44.2–50.4)    | 62.1 (59.0–62.1)    |

|                            |     |                  |                  |
|----------------------------|-----|------------------|------------------|
| Ret-HGB(pg)                | P   | 18.3 (18.3–18.4) | 20.2 (19.5–20.2) |
|                            | S   | 19.4 (19.4–19.5) | 21.6 (20.9–21.6) |
| WBC (10 <sup>9</sup> /L)   | P/S | 0.50 (0.42–0.62) | 2.57 (2.12–3.11) |
| PLT-I (10 <sup>9</sup> /L) | P   | 782 (741–825)    | 1166 (1121–1210) |
|                            | S   | 1252 (1247–1477) | 1989 (1940–1990) |
| PLT-O (10 <sup>9</sup> /L) | P   | 926 (871–983)    | 1439 (1378–1497) |
|                            | S   | 1093 (1090–1224) | 1845 (1777–1845) |
| MPV (fL)                   | P   | 5.8 (5.8–5.9)    | 6.5 (6.4–6.6)    |
|                            | S   | 6.3 (6.3–6.4)    | 7.0 (6.8–7.0)    |
| PCT (mL/L)                 | P   | 4.8 (4.5–5.0)    | 7.1 (6.8–7.4)    |
|                            | S   | 8.4 (8.4–9.9)    | 13.3 (12.8–13.3) |
| PDW (fL)                   | P/S | 6.4 (6.4–6.5)    | 7.1 (7.0–7.2)    |

P: ProCyte Dx analyzer; S: Sysmex XT-2000iV analyzer; LLRI: lower limit of the reference interval; ULRI: upper limit of the reference interval; CI: confidence interval

**Table S4.** Reference intervals for WBC DIFF counts in NSG male and female mice measured with a IDEXX ProCyte Dx analyzer (P) and by a microscopic count (M).

| Variable (unit)                  | Method | LLRI (90%CI)     | ULRI (90%CI)     |
|----------------------------------|--------|------------------|------------------|
| Neutrophils (10 <sup>9</sup> /L) | P/M    | 0.38 (0.33–0.46) | 2.16 (1.68–2.67) |
| Lymphocytes (10 <sup>9</sup> /L) | P      | 0.10 (0.05–0.14) | 0.50 (0.45–0.59) |
|                                  | M      | 0.00 (0.00–0.00) | 0.08 (0.06–0.10) |
| Monocytes (10 <sup>9</sup> /L)   | P      | 0.00 (0.00–0.01) | 0.06 (0.05–0.08) |
|                                  | M      | 0.01 (0.00–0.05) | 0.38 (0.33–0.42) |
| Eosinophils (10 <sup>9</sup> /L) | P/M    | 0.00 (0.00–0.00) | 0.04 (0.04–0.05) |

LLRI: lower limit of the reference interval; ULRI: upper limit of the reference interval; CI: confidence interval

**Table S5.** Reference intervals for biochemical analytes measured by the VetScan VS2 analyzer in NSG male and female mice.

| Variable (unit)     | LLRI (90%CI)        | ULRI (90%CI)        |
|---------------------|---------------------|---------------------|
| Sodium (mmol/L)     | 140.3 (139.9–142.2) | 149.7 (148.3–150.6) |
| Potassium (mmol/L)  | 3.7 (3.5–4.0)       | 6.0 (5.7–6.2)       |
| Calcium (mmol/L)    | 2.23 (2.18–2.28)    | 2.72 (2.65–2.80)    |
| Phosphate (mmol/L)  | 1.6 (1.5–1.7)       | 2.6 (2.5–2.7)       |
| Glucose (mmol/L)    | 10.7 (9.9–11.6)     | 18.5 (17.6–19.4)    |
| Urea (mmol/L)       | 6.0 (5.5–6.4)       | 10.1 (9.7–10.6)     |
| Creatinine (μmol/L) | <10 -               | 38 (33–43)          |
| Bilirubin (μmol/L)  | —                   | —                   |
| Proteins (g/L)      | 44.2 (43.5–45.0)    | 53.5 (51.8–55.6)    |
| Albumin (g/L)       | 30.1 (29.2–31.0)    | 38.4 (37.4–39.4)    |
| Globulins (g/L)     | 8.0 (6.2–9.9)       | 18.0 (17.4–18.9)    |
| ALT (U/L)           | 19.6 (18.2–21.0)    | 32.3 (30.8–33.8)    |
| ALP (U/L)           | 42.9 (34.5–51.8)    | 123.3 (114.0–132.3) |
| Amylase (U/L)       | 661 (598–727)       | 1260 (1190–1327)    |

LLRI: lower limit of the reference interval; ULRI: upper limit of the reference interval; CI: confidence interval

**Table S6.** Reference intervals for cell percentages, ratio and indexes for bone marrow aspiration in NSG male (*n* = 20) and female (*n* = 20) mice.

| Cell type            | LLRI (90%CI)     | ULRI (90%CI)     |
|----------------------|------------------|------------------|
| Myeloblast           | 0.2 (0.2–0.6)    | 2.6 (1.6–2.6)    |
| Promyelocyte         | 1.4 (1.4–1.6)    | 5.6 (4.6–5.6)    |
| Myelocyte            | 3.6 (3.6–4.4)    | 10.7 (8.2–10.8)  |
| Metamyelocyte        | 5.2 (5.2–5.4)    | 11.8 (11.6–11.8) |
| Band neutrophil      | 12.8 (12.8–14.6) | 26.7 (21.6–26.8) |
| Segmented neutrophil | 17.3 (17.2–21.0) | 37.4 (35.8–37.4) |
| Eosinophil           | 0.0 (0.0–0.02)   | 2.2 (1.6–2.2)    |
| Rubriblast           | 0.2 (0.2–0.2)    | 1.4 (1.2–1.4)    |
| Prorubricyte         | 0.4 (0.4–1.0)    | 4.0 (3.4–4.0)    |
| Rubricyte            | 6.4 (6.4–8.8)    | 18.4 (16.6–18.4) |
| Metarubricyte        | 9.5 (9.4–13.8)   | 29.2 (26.4–29.2) |
| Lymphocyte           | 0.0 (0.0–0.0)    | 1.2 (0.4–1.2)    |
| Macrophage           | 0.0 (0.0–0.0)    | 1.2 (0.8–1.2)    |
| M:E ratio            | 1.13 (1.12–1.19) | 4.63 (2.91–4.66) |
| MMI                  | 0.13 (0.13–0.14) | 0.31 (0.25–0.31) |
| EMI                  | 0.03 (0.03–0.05) | 0.14 (0.13–0.14) |

LLRI: lower limit of the reference interval; ULRI: upper limit of the reference interval; CI: confidence interval; SD: standard deviation; M:E: Ratio Myeloid:Erythroid; MMI: Myeloid Maturation Index; EMI: Erythroid Maturation Index.

Publisher: AALAS; Journal: JAALAS:Journal of the American Association for Laboratory  
Animal Science;

Copyright: , ; Volume: 99; Issue: 99; Manuscript: 20000020; Month: ; Year: 2020

DOI: 10.30802/AALAS-JAALAS-20-000020; TOC Head: ; Section Head:

Article Type: ORIGINAL RESEARCH; Collection Codes: , , , ,

**Table S7.** Reference Intervals for megakaryocytes and adipocytes counts in diaphysis and metaphysis of femoral bone marrow of NSG male ( $n = 20$ ) and female ( $n = 20$ ) mice.

| Cell type      | Femoral location | LLRI (90%CI) | ULRI (90%CI)  |
|----------------|------------------|--------------|---------------|
| Megakaryocytes | D                | 33 (32–62)   | 157 (132–157) |
|                | M                | 11 (2–19)    | 94 (94–103)   |
| Adipocytes     | D                | 0 (0–0)      | 27 (21–27)    |
|                | M                | 0 (0–12)     | 207 (178–235) |

LLRI: lower limit of the reference interval; ULRI: upper limit of the reference interval; CI: confidence interval; D: diaphysis; M: metaphysis.
